# Supplementary material for: Knitting an oxygenated network-coat on carbon nanotubes from biomass and their applications in catalysis
Source: Royal Society of Chemistry journal article supplement (doi:10.1039/c1jm10989h), 2011-01-01
Supplement: c1jm10989h.pdf [file c1jm10989h.pdf]

*Supporting information for*

**Knitting an oxygenated network-coat on carbon nanotubes from  
biomass and their applications in catalysis**

Jun Ming<sup>1,2,3</sup>, Ruixia Liu<sup>1,2,3</sup>, Guanfeng Liang<sup>1,2,3</sup>, Haiyang Cheng<sup>1,2</sup>, Yancun Yu<sup>1,2</sup>,

Fengyu Zhao<sup>1,2\*</sup>

<sup>1</sup>*State Key Laboratory of Electroanalytical Chemistry;*

<sup>2</sup>*Laboratory of Green Chemistry and Process, Changchun Institute of Applied  
Chemistry, Chinese Academy of Sciences, Changchun 130022, P. R. China;*

<sup>3</sup>*Graduate university of the Chinese Academy of Sciences, Beijing 100049, P. R.  
China.*

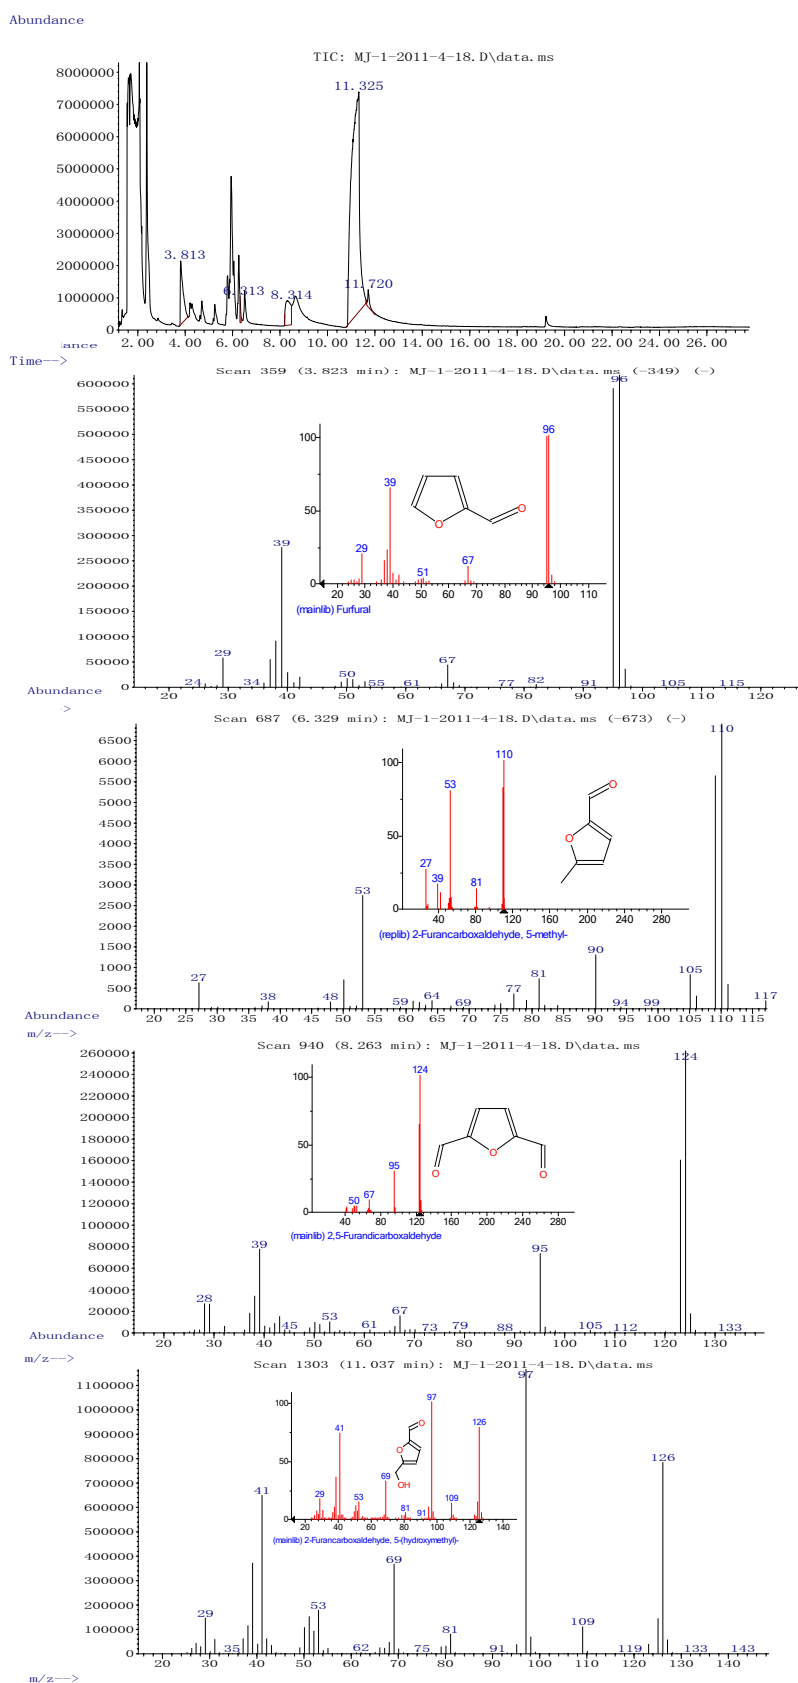

**Fig. S1** GC-MS analysis of bio-chemicals derived from hydrothermal treatment of biomass. Some quoted furfural aromatic compounds were well characterized.

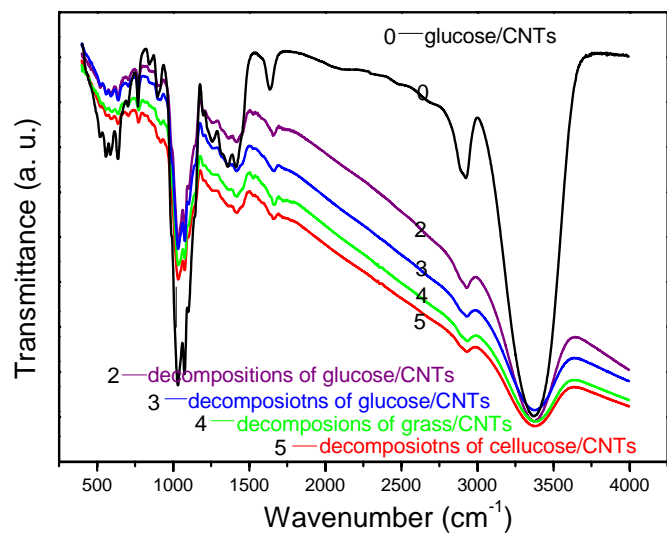

**Fig. S2** FTIR spectra of biomass/CNTs and (decompositions of biomass)/CNTs. The number of curve corresponds to the curve in text, including the experimental conditions.

**Table S1** Comparison of the catalytic activity of Ru catalysts in selective hydrogenation of citral.

| Catalyst                  | Time (h) | Conv. (%) | TOF (h <sup>-1</sup> ) <sup>[a]</sup> | Selectivity (%) |     |     |      |        |
|---------------------------|----------|-----------|---------------------------------------|-----------------|-----|-----|------|--------|
|                           |          |           |                                       | CAL             | COL | G&N | DCOL | others |
| 1.5 wt% Ru/f-CNTs         | 1.5      | 89        | 400                                   | 5               | 21  | 74  | 0    | 0      |
| Recycle 1#                | 1.5      | 85        | 382                                   | 7               | 18  | 75  | 0    | 0      |
| Recycle 2#                | 1.5      | 84        | 377                                   | 4               | 20  | 76  | 0    | 0      |
| <sup>[b]</sup> Recycle 3# | 1.5      | 81        | 364                                   | 8               | 19  | 73  | 0    | 0      |
| 1.2 wt% Ru/CNTs           | 1.5      | 52        | 292                                   | 23              | 15  | 62  | 0    | 0      |
| Recycle 1#                | 1.5      | 49        | 275                                   | 21              | 19  | 60  | 0    | 0      |
| Recycle 2#                | 1.5      | 47        | 264                                   | 19              | 23  | 58  | 0    | 0      |
| <sup>[b]</sup> Recycle 3# | 1.5      | 43        | 241                                   | 17              | 23  | 60  | 0    | 0      |
| <sup>[c]</sup> CNTs       | 1.5      | 0         | 0                                     | 0               | 0   | 0   | 0    | 0      |
| <sup>[c]</sup> f-CNTs     | 1.5      | 0         | 0                                     | 0               | 0   | 0   | 0    | 0      |
| 5 wt% Ru/C (commercial)   | 2        | 82        | 83                                    | 1               | 32  | 37  | 20   | 11     |

[a] TOF = (moles of citral conversion)/(total moles of Ru)/time. Reaction conditions: citral 2 mmol, water 5 mL, catalysts 20 mg, temperature 80 °C, H<sub>2</sub> 4 MPa.

[b] The results of ICP-AES confirm that no metal was leached from the support of f-CNTs or CNTs even the catalyst experienced four times recycle reaction.

[c] The catalysts of blank CNTs and f-CNTs have no catalytic activity in the hydrogenation of citral.
